# Supplementary material for: Oxidative Phosphorylation-Related Signature Participates in Cancer Development, and PTPRG Overexpression Suppresses the Cancer Progression in Clear Cell Renal Cell Carcinoma
Source: Hindawi journal article supplement (doi:10.1155/2022/8300187), 2022-11-10

**A**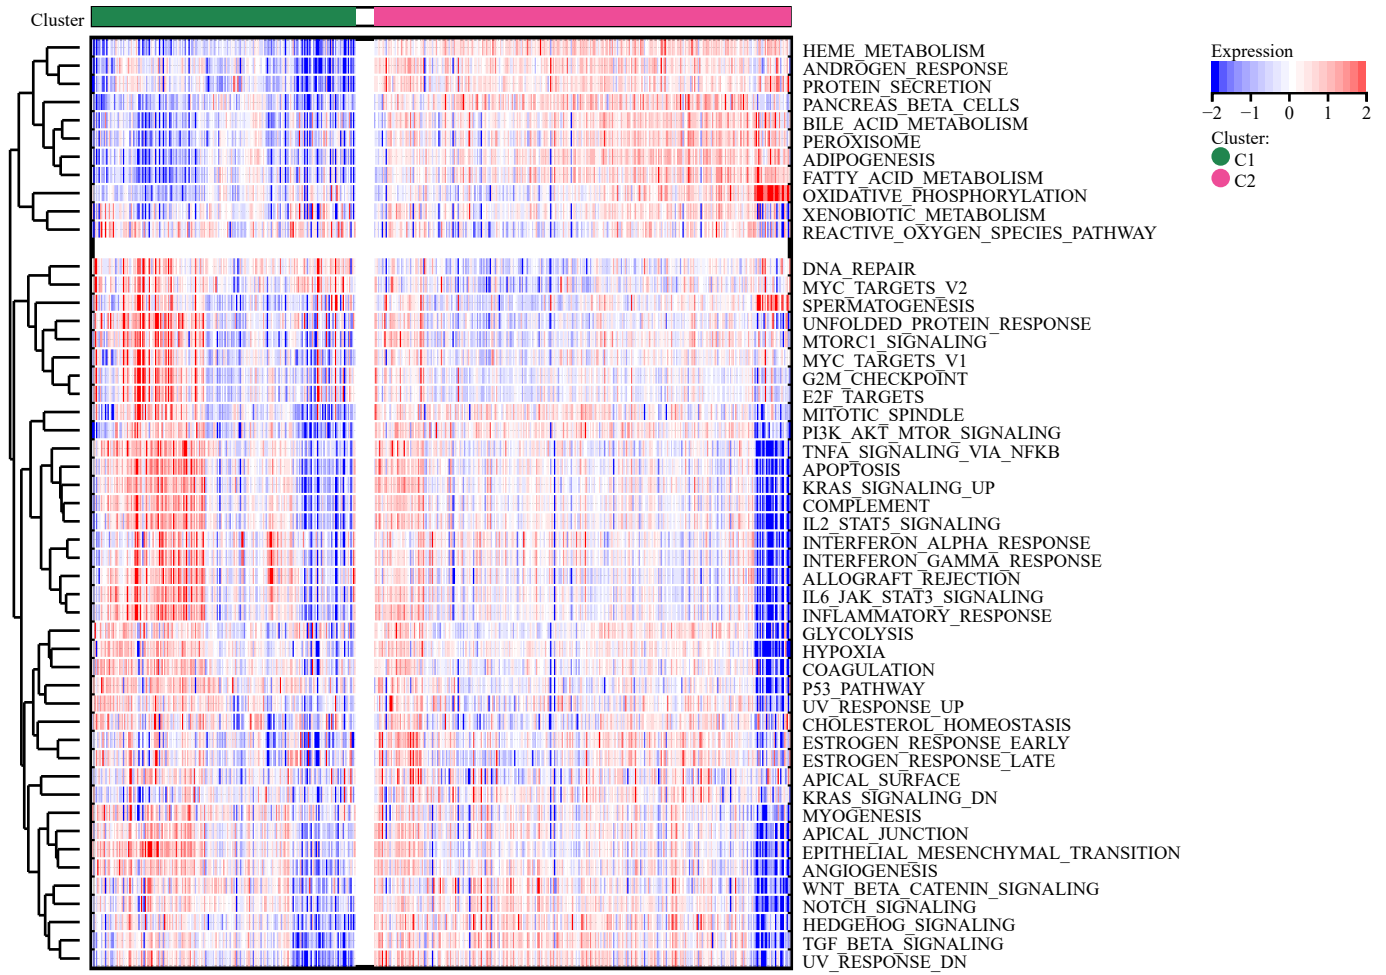**B**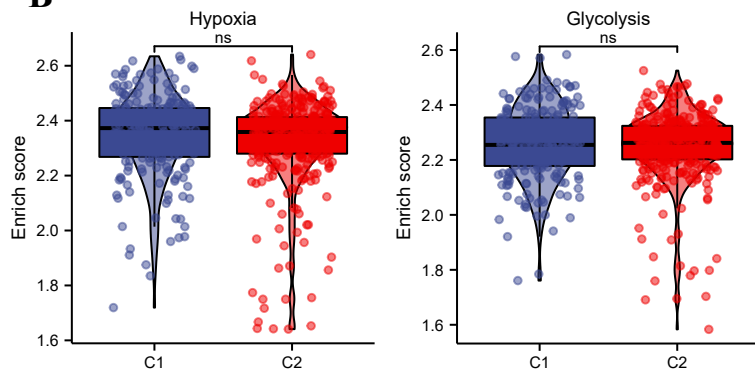**C**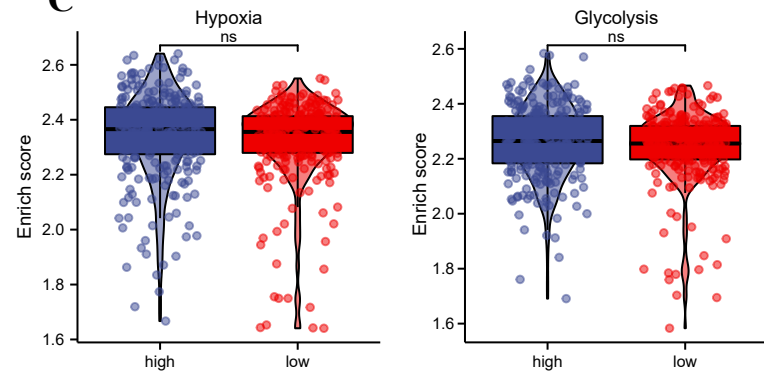

Supplement: f2 [file 8300187.f2.pdf]
